# Supplementary material
Source: publisher site journal article supplement (https://www.dovepress.com/article/447857)
Supplement: Supplementary file 1 [file get_supplementary_file.php]

Supplement Materials

Table S1 Primers for Species identification

| **Gene** | **Primer sequence (5'-3')** | **Annealing temp (℃)** | **Length(bp)** | **Reference** |
| --- | --- | --- | --- | --- |
| *Hsp60*-F | F:GGTAGAAGAAGGCGTGGTTGC | 57 | 342 | 1 |
| *Hsp60*-R | R:ATGCATTCGGTGGTGATCATCAG |  |  |  |

Table S2 Primers for Resistance Genes

| **Gene** | **Primer sequence (5'-3')** | **Annealing temp (℃)** | **Length(bp)** | **Reference** |
| --- | --- | --- | --- | --- |
| **Carbapenemase** | |  |  |  |
| KPC | F:GTATCGCCGTCTAGTTCTGC | 56 | 638 | 2 |
|  | R:GGTCGTGTTTCCCTTTAGCC |  |  |  |
| IMP | F: AACCAGTTTTGCCTTACCAT | 56 | 587 | 2 |
|  | R: CTACCGCAGCAGAGTCTTTG |  |  |  |
| VIM | F:GATGGTGTTTGGTCGCATA | 52 | 390 | 2 |
|  | R:CGAATGCGCAGCACCAG |  |  |  |
| NDM | F:GAAGCTGAGCACCGCATTAG | 58 | 982 | 2 |
|  | R:GGGCCGTATGAGTGATTGC |  |  |  |
| OXA-48 | F:TTGGTGGCATCGATTATCGG | 62 | 743 | 2 |
|  | R:GAGCACTTCTTTTGTGATGGC |  |  |  |
| **ESBLs** | |  |  |  |
| SHV | F:AGCCGCTTGAGCAAATTAAAC | 62 | 713 | 2 |
|  | R:ATCCCGCAGATAAATCACCAC |  |  |  |
| TEM | F:CATTTCCGTGTCGCCCTTATTC | 62 | 800 | 2 |
|  | R:CGTTCATCCATAGTTGCCTGAC |  |  |  |
| CTX-M | F:GGTGATGAACGCTTTCCAAT | 62 | 518 | 2 |
|  | R:TTATCACCTACAGTCCACGA |  |  |  |
| **AmpC** | |  |  |  |
| DHA | F:AACTTTCACAGGTGTGCTGGGT | 62 | 405 | 3 |
|  | R:CCGTACGCATACTGGCTTTGC |  |  |  |
| ACC | F:AACAGCCTCAGCAGCCGGTTA | 62 | 346 | 3 |
|  | R:TTCGCCGCAATCATCCCTAGC |  |  |  |
| CIT | F:TGGCCAGAACTGACAGGCAAA | 66 | 462 | 3 |
|  | R:TTTCTCCTGAACGTGGCTGGC |  |  |  |
| MOX | F:GCTGCTCAAGGAGCACAGGAT | 59 | 520 | 3 |
|  | R:CACATTGACATAGGTGTGGTGC |  |  |  |
| EBC | F:TCGGTAAAGCCGATGTTGCGG | 64 | 302 | 3 |
|  | R:CTTCCACTGCGGCTGCCAGTT |  |  |  |
| FOX | F:AACATGGGGTATCAGGGAGATG | 62 | 190 | 3 |
|  | R:CAAAGCGCGTAACCGGATTGG |  |  |  |

**References：**

1. Hoffmann H, Roggenkamp A. Population genetics of the nomenspecies Enterobacter cloacae. Appl Environ Microbiol. Sep 2003;69(9):5306-18.
2. Li Z, Ding Z, Yang J, et al. Carbapenem-Resistant Klebsiella pneumoniae in Southwest China: Molecular Characteristics and Risk Factors Caused by KPC and NDM Producers. Infect Drug Resist. 2021;14:3145-3158.
3. Pérez-Pérez FJ, Hanson ND. Detection of plasmid-mediated AmpC beta-lactamase genes in clinical isolates by using multiplex PCR. Journal of clinical microbiology. 2002;40(6):2153-2162
